# Supplementary material for: Intra-host π–π interactions in crown ether complexes revealed by cryogenic ion mobility-mass spectrometry
Source: Royal Society of Chemistry journal article supplement (doi:10.1039/d4cp00835a), 2024-01-01
Supplement: d4cp00835a1.pdf [file d4cp00835a1.pdf]

## Electronic Supplementary Information

### **Intra-Host $\pi$ - $\pi$ Interactions in Crown Ether Complexes Revealed by Cryogenic Ion Mobility-Mass Spectrometry**

Ryosuke Ito, Keijiro Ohshimo\* and Fuminori Misaizu\*

*Department of Chemistry, Graduate School of Science, Tohoku University, Sendai 980-8578, Japan*

*\*Corresponding authors*

*E-mail: ohshimo@tohoku.ac.jp (K. Ohshimo), misaizu@tohoku.ac.jp (F. Misaizu)*

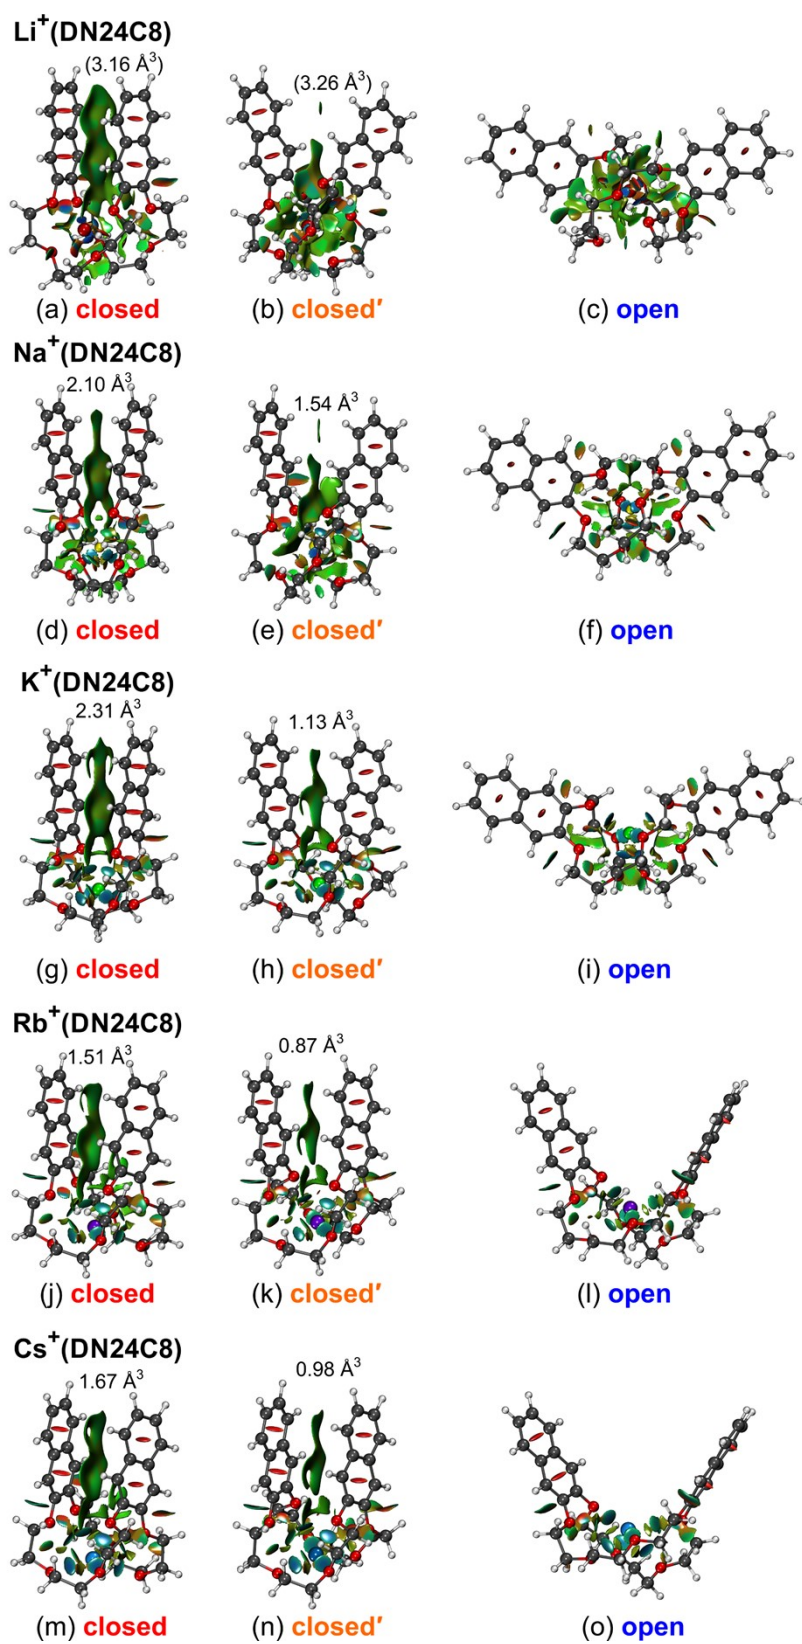

**Fig. S1** Reduced density gradient (RDG) isosurfaces and the volume of the  $\pi$ - $\pi$  interaction region between the two aromatic rings of the most stable **closed**, **closed'**, and

**open** conformers of  $M^+(\text{DN24C8})$  ( $M = \text{Li, Na, K, Rb, and Cs}$ ). The volume of the  $\pi$ - $\pi$  interaction region between the two aromatic rings determined by the domain analysis is shown near the interaction region. For  $\text{Li}^+(\text{DN24C8})$ , the  $\pi$ - $\pi$  interaction region between the two naphthalene rings overlapped with the host-guest interaction region. Therefore, the volumes of the  $\pi$ - $\pi$  interaction region for the **closed** and **closed'** conformers were overestimated and were larger than that for the parallel-displaced naphthalene dimer ( $2.59 \text{ \AA}^3$ ).

### Geometrical coordinates of conformers in Table 1.

#### (a) $\text{Li}^+(\text{DN24C8})$ (closed)

|    |           |           |           |
|----|-----------|-----------|-----------|
| Li | 2.015849  | -0.946600 | 0.048504  |
| O  | 3.252095  | 3.125326  | -1.397184 |
| O  | 3.143842  | -2.700513 | -0.297628 |
| O  | 3.327428  | -0.859922 | 1.658422  |
| O  | 1.069542  | 2.729918  | 0.289136  |
| O  | 0.966100  | 0.277655  | 1.420295  |
| O  | 2.984919  | 0.301242  | -1.230181 |
| O  | 0.649406  | -0.812573 | -1.484725 |
| O  | 0.470455  | -2.734426 | 0.233087  |
| C  | 4.045035  | 2.345506  | -0.517620 |
| C  | 4.362332  | -2.584306 | 0.430023  |
| C  | 4.079461  | -2.058344 | 1.821731  |
| C  | -0.173141 | 2.254459  | 0.582714  |
| C  | -0.209545 | 0.989295  | 1.236848  |
| C  | 1.058686  | -3.752334 | -0.594423 |
| C  | 2.465750  | -3.939619 | -0.100961 |
| C  | 2.693802  | -0.422617 | 2.858452  |
| C  | 1.796452  | 0.733566  | 2.499233  |
| C  | 1.141318  | 3.898694  | -0.523116 |
| C  | 2.599730  | 4.212372  | -0.764270 |
| C  | 2.366828  | 0.401063  | -2.514528 |
| C  | 0.874532  | 0.330147  | -2.312188 |
| C  | -0.639072 | -1.174775 | -1.194962 |
| C  | -0.723244 | -2.251944 | -0.271584 |
| C  | 4.236567  | 0.978222  | -1.120983 |
| C  | -1.389402 | 0.438612  | 1.631731  |
| C  | -1.350784 | 2.892844  | 0.294651  |
| C  | -2.619465 | 1.086886  | 1.361811  |
| C  | -1.928908 | -2.738992 | 0.123211  |
| C  | -3.127154 | -2.163544 | -0.376734 |
| C  | -1.768144 | -0.589019 | -1.684949 |
| C  | -2.596066 | 2.320892  | 0.668234  |
| C  | -3.823337 | 2.962944  | 0.374273  |
| C  | -5.010956 | 2.398911  | 0.756594  |
| C  | -5.031139 | 1.168305  | 1.449109  |
| C  | -3.860210 | 0.525801  | 1.745215  |
| C  | -3.042236 | -1.074665 | -1.281318 |
| C  | -4.236821 | -0.488458 | -1.760787 |
| C  | -5.455876 | -0.970463 | -1.365729 |
| C  | -5.540057 | -2.058681 | -0.471219 |
| C  | -4.399986 | -2.641022 | 0.014677  |

|   |           |           |           |
|---|-----------|-----------|-----------|
| H | 3.537342  | 2.232700  | 0.440359  |
| H | 5.018921  | 2.821309  | -0.360621 |
| H | 4.983005  | -1.881418 | -0.120790 |
| H | 4.879776  | -3.544799 | 0.476991  |
| H | 3.490768  | -2.776096 | 2.400175  |
| H | 5.011231  | -1.857154 | 2.356240  |
| H | 0.486533  | -4.676547 | -0.504793 |
| H | 1.061103  | -3.417786 | -1.632961 |
| H | 2.967300  | -4.730518 | -0.662843 |
| H | 2.450472  | -4.202297 | 0.959531  |
| H | 3.439882  | -0.113384 | 3.594385  |
| H | 2.098366  | -1.244108 | 3.265912  |
| H | 1.172451  | 1.001077  | 3.352881  |
| H | 2.363627  | 1.603950  | 2.174516  |
| H | 0.635004  | 3.708584  | -1.473271 |
| H | 0.661244  | 4.742518  | -0.021104 |
| H | 3.094676  | 4.458911  | 0.177915  |
| H | 2.666043  | 5.079224  | -1.421758 |
| H | 2.708932  | -0.428679 | -3.137433 |
| H | 2.619697  | 1.351602  | -2.981020 |
| H | 0.503354  | 1.216868  | -1.797386 |
| H | 0.368158  | 0.206453  | -3.270720 |
| H | 4.707638  | 1.043992  | -2.103280 |
| H | 4.872971  | 0.389122  | -0.462926 |
| H | -1.377695 | -0.525695 | 2.122386  |
| H | -1.359079 | 3.848982  | -0.207715 |
| H | -1.967984 | -3.555815 | 0.832671  |
| H | -1.721930 | 0.253229  | -2.360382 |
| H | -3.808974 | 3.909405  | -0.150766 |
| H | -5.942681 | 2.898674  | 0.530108  |
| H | -5.976897 | 0.732834  | 1.739566  |
| H | -3.868004 | -0.422924 | 2.265544  |
| H | -4.172794 | 0.349782  | -2.442220 |
| H | -6.362752 | -0.515385 | -1.739163 |
| H | -6.509618 | -2.432144 | -0.172425 |
| H | -4.457650 | -3.476741 | 0.700297  |

(b) Li<sup>+</sup>(DN24C8) (closed')

|    |           |           |           |
|----|-----------|-----------|-----------|
| Li | 1.986626  | -0.191451 | 0.003264  |
| O  | 3.712715  | 1.409094  | -0.236102 |
| O  | 3.592520  | -1.585680 | -0.278980 |
| O  | 2.538191  | -0.603935 | 2.050652  |
| O  | 1.260280  | 1.969848  | 0.642375  |
| O  | -0.162047 | 0.034599  | 1.634295  |
| O  | 2.379560  | 0.182855  | -2.260481 |
| O  | 0.124238  | -0.291761 | -1.153119 |
| O  | 1.033950  | -2.443260 | 0.086924  |
| C  | 4.033197  | 1.815878  | -1.561882 |
| C  | 4.410942  | -1.469721 | 0.883677  |
| C  | 3.559816  | -1.593067 | 2.125824  |
| C  | -0.088221 | 2.209754  | 0.650014  |
| C  | -0.850008 | 1.136666  | 1.190335  |
| C  | 1.785276  | -2.932368 | -1.037463 |
| C  | 3.231588  | -2.924989 | -0.620209 |
| C  | 1.524978  | -0.847973 | 3.025395  |
| C  | 0.467908  | 0.211796  | 2.908477  |
| C  | 2.145319  | 3.075707  | 0.511936  |
| C  | 3.531921  | 2.487968  | 0.672325  |
| C  | 1.339234  | 1.077778  | -2.618740 |

|   |           |           |           |
|---|-----------|-----------|-----------|
| C | 0.045654  | 0.317871  | -2.443952 |
| C | -0.815110 | -1.252696 | -0.864894 |
| C | -0.321915 | -2.385779 | -0.168501 |
| C | 3.698370  | 0.660317  | -2.482158 |
| C | -2.208092 | 1.186858  | 1.196271  |
| C | -0.702458 | 3.329327  | 0.168976  |
| C | -2.884271 | 2.322512  | 0.676201  |
| C | -1.168532 | -3.367624 | 0.244306  |
| C | -2.558289 | -3.274145 | -0.028502 |
| C | -2.140854 | -1.140760 | -1.160963 |
| C | -2.123935 | 3.408411  | 0.172611  |
| C | -2.801581 | 4.543715  | -0.330440 |
| C | -4.170642 | 4.591302  | -0.338831 |
| C | -4.926736 | 3.507672  | 0.156415  |
| C | -4.296775 | 2.397795  | 0.653752  |
| C | -3.045836 | -2.154213 | -0.749723 |
| C | -4.432288 | -2.060219 | -1.020164 |
| C | -5.291192 | -3.038433 | -0.596056 |
| C | -4.804971 | -4.155935 | 0.117147  |
| C | -3.469339 | -4.271333 | 0.394100  |
| H | 5.097381  | 2.054328  | -1.637030 |
| H | 3.466855  | 2.709537  | -1.834159 |
| H | 4.860515  | -0.481563 | 0.830732  |
| H | 5.198046  | -2.226833 | 0.879983  |
| H | 3.093524  | -2.580633 | 2.182731  |
| H | 4.168313  | -1.440700 | 3.021930  |
| H | 1.461313  | -3.944222 | -1.286853 |
| H | 1.630625  | -2.270685 | -1.891426 |
| H | 3.862925  | -3.275569 | -1.438817 |
| H | 3.367610  | -3.584181 | 0.238395  |
| H | 1.963889  | -0.825216 | 4.026753  |
| H | 1.084058  | -1.831391 | 2.842083  |
| H | -0.273449 | 0.094232  | 3.700853  |
| H | 0.913392  | 1.204977  | 2.970131  |
| H | 2.016413  | 3.550675  | -0.463227 |
| H | 1.941463  | 3.815572  | 1.289190  |
| H | 3.630073  | 2.061099  | 1.668339  |
| H | 4.297172  | 3.254335  | 0.528038  |
| H | 1.444884  | 1.407767  | -3.656051 |
| H | 1.340096  | 1.949819  | -1.961121 |
| H | -0.801415 | 1.002898  | -2.498409 |
| H | -0.059312 | -0.465966 | -3.195798 |
| H | 3.828569  | 0.962559  | -3.525155 |
| H | 4.345836  | -0.184172 | -2.263862 |
| H | -2.766154 | 0.344952  | 1.585479  |
| H | -0.136042 | 4.160918  | -0.226986 |
| H | -0.773996 | -4.219862 | 0.782473  |
| H | -2.523479 | -0.267396 | -1.672040 |
| H | -2.222425 | 5.376337  | -0.708500 |
| H | -4.678269 | 5.464375  | -0.724496 |
| H | -6.006329 | 3.560118  | 0.145959  |
| H | -4.869704 | 1.565518  | 1.042032  |
| H | -4.801334 | -1.204138 | -1.570375 |
| H | -6.348129 | -2.960370 | -0.809231 |
| H | -5.494058 | -4.922476 | 0.442731  |
| H | -3.092927 | -5.126802 | 0.939682  |

(c) Li<sup>+</sup>(DN24C8) (open)

|    |           |          |          |
|----|-----------|----------|----------|
| Li | -0.011061 | 0.496150 | 0.014043 |
|----|-----------|----------|----------|

|   |           |           |           |
|---|-----------|-----------|-----------|
| O | 1.590999  | 3.363600  | 0.104973  |
| O | -0.992885 | 1.790530  | -1.245389 |
| O | -0.663226 | -0.787641 | -1.517424 |
| O | 1.889733  | 0.756086  | -1.048783 |
| O | 1.180564  | -1.299544 | 0.417621  |
| O | 0.566094  | 1.381147  | 1.840207  |
| O | -1.482719 | -0.265836 | 1.299752  |
| O | -2.890321 | 2.000929  | 0.810195  |
| C | 1.860369  | 3.354150  | 1.495978  |
| C | -1.700079 | 1.150754  | -2.305913 |
| C | -0.875983 | -0.047152 | -2.708508 |
| C | 2.924735  | -0.050970 | -0.650621 |
| C | 2.525700  | -1.172749 | 0.127964  |
| C | -2.912734 | 2.943911  | -0.262309 |
| C | -1.517365 | 3.055201  | -0.843720 |
| C | 0.164214  | -1.929625 | -1.671313 |
| C | 0.510746  | -2.373759 | -0.271418 |
| C | 2.213534  | 1.983437  | -1.717134 |
| C | 2.685984  | 3.027730  | -0.730866 |
| C | 0.158905  | 0.452614  | 2.844791  |
| C | -1.313131 | 0.209959  | 2.648892  |
| C | -2.807057 | -0.372190 | 0.916583  |
| C | -3.540526 | 0.811077  | 0.625452  |
| C | 1.853460  | 1.953904  | 2.069588  |
| C | 3.445111  | -2.059137 | 0.601669  |
| C | 4.249742  | 0.139230  | -0.934549 |
| C | 4.822803  | -1.891738 | 0.316577  |
| C | -4.841581 | 0.719045  | 0.214368  |
| C | -5.461554 | -0.544926 | 0.048124  |
| C | -3.387035 | -1.598305 | 0.785131  |
| C | 5.225263  | -0.778693 | -0.461919 |
| C | 6.600712  | -0.603251 | -0.746741 |
| C | 7.526572  | -1.494442 | -0.275395 |
| C | 7.124161  | -2.601624 | 0.503400  |
| C | 5.801149  | -2.796053 | 0.793791  |
| C | -4.725717 | -1.721987 | 0.338277  |
| C | -5.348851 | -2.983745 | 0.181614  |
| C | -6.646575 | -3.068853 | -0.243179 |
| C | -7.381423 | -1.896407 | -0.529154 |
| C | -6.804438 | -0.663983 | -0.386428 |
| H | 1.064696  | 3.933335  | 1.961353  |
| H | 2.817030  | 3.838902  | 1.711549  |
| H | -1.819637 | 1.837193  | -3.148765 |
| H | -2.681237 | 0.818667  | -1.960599 |
| H | -1.412157 | -0.646985 | -3.448029 |
| H | 0.088920  | 0.262387  | -3.120778 |
| H | -3.642239 | 2.638743  | -1.011778 |
| H | -3.213279 | 3.912135  | 0.136388  |
| H | -0.819232 | 3.427032  | -0.100103 |
| H | -1.527187 | 3.739692  | -1.698219 |
| H | 1.069535  | -1.664081 | -2.226916 |
| H | -0.367232 | -2.721075 | -2.206408 |
| H | -0.395585 | -2.558304 | 0.298094  |
| H | 1.141115  | -3.261872 | -0.280018 |
| H | 2.940218  | 1.799939  | -2.508407 |
| H | 1.275630  | 2.311813  | -2.155296 |
| H | 3.016538  | 3.916682  | -1.273776 |
| H | 3.523666  | 2.651669  | -0.139960 |
| H | 0.320712  | 0.878882  | 3.837534  |

|   |           |           |           |
|---|-----------|-----------|-----------|
| H | 0.727909  | -0.473697 | 2.744367  |
| H | -1.677120 | -0.546716 | 3.345480  |
| H | -1.870515 | 1.137098  | 2.770871  |
| H | 2.625450  | 1.323198  | 1.620012  |
| H | 2.043792  | 2.016297  | 3.144000  |
| H | 3.115724  | -2.893388 | 1.208517  |
| H | 4.589822  | 0.981492  | -1.518536 |
| H | -5.413982 | 1.618457  | 0.026555  |
| H | -2.810538 | -2.483888 | 1.018884  |
| H | 6.910226  | 0.244676  | -1.343829 |
| H | 8.574659  | -1.353310 | -0.499216 |
| H | 7.867566  | -3.296015 | 0.868507  |
| H | 5.486569  | -3.642988 | 1.389426  |
| H | -4.784288 | -3.878912 | 0.408200  |
| H | -7.117636 | -4.034917 | -0.358156 |
| H | -8.407370 | -1.978039 | -0.859840 |
| H | -7.367948 | 0.234750  | -0.600637 |

(d) Na<sup>+</sup>(DN24C8) (closed)

|    |           |           |           |
|----|-----------|-----------|-----------|
| Na | -2.112291 | 0.000030  | -0.000055 |
| O  | -3.529015 | -1.965505 | -0.427422 |
| O  | -3.528973 | 1.965560  | 0.427408  |
| O  | -2.989502 | -0.024699 | 2.282236  |
| O  | -0.953076 | -2.044992 | 0.521890  |
| O  | -0.233986 | 0.042032  | 1.900962  |
| O  | -2.989502 | 0.024708  | -2.282302 |
| O  | -0.233990 | -0.042020 | -1.900900 |
| O  | -0.953030 | 2.045034  | -0.521859 |
| C  | -4.008709 | -2.109554 | -1.758142 |
| C  | -4.008697 | 2.109573  | 1.758121  |
| C  | -4.202797 | 0.715548  | 2.314060  |
| C  | 0.400582  | -1.900138 | 0.648162  |
| C  | 0.779519  | -0.766386 | 1.423244  |
| C  | -1.472509 | 3.199044  | 0.127259  |
| C  | -2.966797 | 3.154953  | -0.116815 |
| C  | -2.098193 | 0.282591  | 3.345862  |
| C  | -0.822205 | -0.473986 | 3.105847  |
| C  | -1.472569 | -3.199006 | -0.127211 |
| C  | -2.966859 | -3.154888 | 0.116844  |
| C  | -2.098134 | -0.282638 | -3.345865 |
| C  | -0.822162 | 0.473957  | -3.105826 |
| C  | 0.779538  | 0.766387  | -1.423203 |
| C  | 0.400624  | 1.900153  | -0.648129 |
| C  | -4.202792 | -0.715548 | -2.314135 |
| C  | 2.089274  | -0.484024 | 1.647853  |
| C  | 1.348767  | -2.714945 | 0.103254  |
| C  | 3.102488  | -1.316283 | 1.103955  |
| C  | 1.348825  | 2.714950  | -0.103234 |
| C  | 2.726930  | 2.436078  | -0.319969 |
| C  | 2.089285  | 0.484006  | -1.647827 |
| C  | 2.726878  | -2.436096 | 0.319979  |
| C  | 3.740657  | -3.252225 | -0.235748 |
| C  | 5.062878  | -2.969228 | -0.013539 |
| C  | 5.434453  | -1.857137 | 0.771762  |
| C  | 4.474190  | -1.046381 | 1.315180  |
| C  | 3.102516  | 1.316257  | -1.103946 |
| C  | 4.474212  | 1.046336  | -1.315187 |
| C  | 5.434492  | 1.857082  | -0.771784 |
| C  | 5.062941  | 2.969180  | 0.013517  |

|   |           |           |           |
|---|-----------|-----------|-----------|
| C | 3.740726  | 3.252195  | 0.235742  |
| H | -4.960734 | -2.647704 | -1.759361 |
| H | -3.292528 | -2.677386 | -2.358383 |
| H | -4.960718 | 2.647730  | 1.759334  |
| H | -3.292524 | 2.677378  | 2.358396  |
| H | -4.599052 | 0.762466  | 3.332054  |
| H | -4.904809 | 0.168765  | 1.686554  |
| H | -1.228988 | 3.160436  | 1.192682  |
| H | -1.044691 | 4.103798  | -0.310583 |
| H | -3.152748 | 3.125709  | -1.188735 |
| H | -3.450777 | 4.038568  | 0.305111  |
| H | -2.537023 | -0.022072 | 4.300341  |
| H | -1.884645 | 1.354127  | 3.379038  |
| H | -0.129096 | -0.331237 | 3.936653  |
| H | -1.034664 | -1.536149 | 2.981544  |
| H | -1.229038 | -3.160421 | -1.192633 |
| H | -1.044768 | -4.103758 | 0.310651  |
| H | -3.152823 | -3.125609 | 1.188760  |
| H | -3.450845 | -4.038510 | -0.305062 |
| H | -2.536918 | 0.021967  | -4.300383 |
| H | -1.884577 | -1.354174 | -3.378969 |
| H | -0.129017 | 0.331186  | -3.936598 |
| H | -1.034632 | 1.536123  | -2.981564 |
| H | -4.599015 | -0.762504 | -3.332140 |
| H | -4.904823 | -0.168743 | -1.686671 |
| H | 2.353518  | 0.392163  | 2.225696  |
| H | 1.078206  | -3.569215 | -0.501296 |
| H | 1.078281  | 3.569228  | 0.501312  |
| H | 2.353514  | -0.392190 | -2.225664 |
| H | 3.456568  | -4.109022 | -0.833151 |
| H | 5.828980  | -3.603560 | -0.437574 |
| H | 6.481402  | -1.645392 | 0.938400  |
| H | 4.750760  | -0.180461 | 1.902815  |
| H | 4.750763  | 0.180410  | -1.902822 |
| H | 6.481436  | 1.645323  | -0.938434 |
| H | 5.829057  | 3.603503  | 0.437541  |
| H | 3.456656  | 4.108997  | 0.833146  |

(e) Na<sup>+</sup>(DN24C8) (closed')

|    |           |           |           |
|----|-----------|-----------|-----------|
| Na | -1.892846 | -0.178287 | 0.014544  |
| O  | -3.932205 | 1.367085  | 0.129059  |
| O  | -3.383905 | -1.981793 | 0.456846  |
| O  | -2.567398 | -1.050646 | -2.077318 |
| O  | -1.473417 | 1.967853  | -1.035378 |
| O  | -0.006633 | -0.112472 | -1.565443 |
| O  | -2.058205 | 1.240501  | 2.078768  |
| O  | -0.071742 | -0.508737 | 1.566309  |
| O  | -0.734740 | -2.622936 | 0.133129  |
| C  | -4.244796 | 1.853328  | 1.432854  |
| C  | -4.254739 | -1.968293 | -0.676505 |
| C  | -3.482006 | -2.132510 | -1.969652 |
| C  | -0.131563 | 2.194689  | -0.927452 |
| C  | 0.657709  | 1.052714  | -1.249834 |
| C  | -1.461701 | -3.156216 | 1.248943  |
| C  | -2.900469 | -3.275874 | 0.814934  |
| C  | -1.484696 | -1.324758 | -2.960397 |
| C  | -0.525555 | -0.166365 | -2.905878 |
| C  | -2.384287 | 3.017572  | -0.730992 |
| C  | -3.761316 | 2.397123  | -0.840488 |



|   |           |           |           |
|---|-----------|-----------|-----------|
| C | -1.160292 | 0.863854  | 3.112888  |
| C | 0.174645  | 0.556690  | 2.484261  |
| C | 0.983928  | -1.263978 | 1.133595  |
| C | 0.606867  | -2.407452 | 0.373649  |
| C | -3.426156 | 1.095328  | 2.447002  |
| C | 2.012601  | 1.093209  | -1.153008 |
| C | 0.462412  | 3.358500  | -0.531054 |
| C | 2.662446  | 2.280018  | -0.723791 |
| C | 1.555971  | -3.221505 | -0.160581 |
| C | 2.935670  | -2.942831 | 0.028535  |
| C | 2.299827  | -0.973427 | 1.345020  |
| C | 1.879939  | 3.422643  | -0.417748 |
| C | 2.533914  | 4.603941  | 0.005884  |
| C | 3.897951  | 4.640584  | 0.126296  |
| C | 4.674505  | 3.499857  | -0.170276 |
| C | 4.069295  | 2.344125  | -0.587059 |
| C | 3.307854  | -1.808778 | 0.792741  |
| C | 4.682029  | -1.518362 | 0.967061  |
| C | 5.639493  | -2.325126 | 0.411197  |
| C | 5.268476  | -3.459276 | -0.342699 |
| C | 3.945864  | -3.761253 | -0.529359 |
| H | -5.310136 | 1.717722  | 1.629167  |
| H | -4.007884 | 2.916294  | 1.505172  |
| H | -4.743750 | -0.996140 | -0.659743 |
| H | -5.011028 | -2.751582 | -0.585670 |
| H | -2.927647 | -3.074741 | -1.977577 |
| H | -4.174632 | -2.131544 | -2.816427 |
| H | -1.064680 | -4.137699 | 1.515482  |
| H | -1.368238 | -2.483685 | 2.102751  |
| H | -3.504247 | -3.679915 | 1.630348  |
| H | -2.964664 | -3.954208 | -0.036585 |
| H | -1.850953 | -1.451438 | -3.983099 |
| H | -0.978682 | -2.238241 | -2.636534 |
| H | 0.297864  | -0.322896 | -3.604214 |
| H | -1.037047 | 0.767272  | -3.138449 |
| H | -2.190614 | 3.383272  | 0.279355  |
| H | -2.269791 | 3.834058  | -1.447804 |
| H | -3.867912 | 1.922170  | -1.813767 |
| H | -4.534167 | 3.161016  | -0.730806 |
| H | -1.532801 | -0.032299 | 3.618476  |
| H | -1.062043 | 1.670390  | 3.843960  |
| H | 0.578082  | 1.417953  | 1.946495  |
| H | 0.877286  | 0.234704  | 3.254229  |
| H | -3.604208 | 1.510768  | 3.442897  |
| H | -3.691796 | 0.033672  | 2.447983  |
| H | 2.585844  | 0.203179  | -1.379088 |
| H | -0.120847 | 4.236665  | -0.292639 |
| H | 1.247553  | -4.078321 | -0.745505 |
| H | 2.600128  | -0.086273 | 1.884771  |
| H | 1.940367  | 5.480413  | 0.231668  |
| H | 4.386818  | 5.549461  | 0.448357  |
| H | 5.750049  | 3.545501  | -0.072549 |
| H | 4.655949  | 1.465239  | -0.823097 |
| H | 4.964064  | -0.651078 | 1.550488  |
| H | 6.686972  | -2.098120 | 0.552901  |
| H | 6.034490  | -4.090048 | -0.771268 |
| H | 3.656631  | -4.630243 | -1.105954 |

(f) Na<sup>+</sup>(DN24C8) (open)

|    |           |           |           |
|----|-----------|-----------|-----------|
| Na | 0.000001  | 0.814220  | 0.000002  |
| O  | -0.666227 | 2.782317  | -1.329728 |
| O  | 0.666229  | 2.782345  | 1.329682  |
| O  | -0.149010 | 0.425184  | 2.382577  |
| O  | -2.474922 | 1.280285  | 0.059862  |
| O  | -1.445514 | -1.144406 | 0.448850  |
| O  | 0.148994  | 0.425118  | -2.382575 |
| O  | 1.445517  | -1.144416 | -0.448822 |
| O  | 2.474923  | 1.280282  | -0.059874 |
| C  | -0.883971 | 2.507715  | -2.707807 |
| C  | 0.883966  | 2.507781  | 2.707770  |
| C  | -0.237066 | 1.608215  | 3.159222  |
| C  | -3.371102 | 0.242870  | 0.080994  |
| C  | -2.814420 | -1.048722 | 0.301789  |
| C  | 2.943635  | 2.507967  | 0.493915  |
| C  | 1.746113  | 3.422294  | 0.666332  |
| C  | -1.075794 | -0.578295 | 2.766425  |
| C  | -1.004480 | -1.660343 | 1.718406  |
| C  | -2.943633 | 2.507961  | -0.493951 |
| C  | -1.746109 | 3.422280  | -0.666388 |
| C  | 1.075772  | -0.578372 | -2.766407 |
| C  | 1.004474  | -1.660392 | -1.718359 |
| C  | 2.814423  | -1.048729 | -0.301770 |
| C  | 3.371104  | 0.242868  | -0.080994 |
| C  | 0.237055  | 1.608134  | -3.159241 |
| C  | -3.616859 | -2.150807 | 0.318884  |
| C  | -4.720558 | 0.380681  | -0.097757 |
| C  | -5.017760 | -2.036996 | 0.142356  |
| C  | 4.720560  | 0.380683  | 0.097751  |
| C  | 5.574475  | -0.752402 | 0.067247  |
| C  | 3.616865  | -2.150812 | -0.318856 |
| C  | -5.574470 | -0.752406 | -0.067243 |
| C  | -6.973624 | -0.630797 | -0.244056 |
| C  | -1.775793 | -1.739485 | -0.216761 |
| C  | -7.218691 | -3.021322 | -0.013462 |
| C  | -5.869417 | -3.167314 | 0.161818  |
| C  | 5.017767  | -2.036996 | -0.142335 |
| C  | 5.869426  | -3.167312 | -0.161787 |
| C  | 7.218700  | -3.021316 | 0.013487  |
| C  | 7.775801  | -1.739476 | 0.216770  |
| C  | 6.973629  | -0.630789 | 0.244056  |
| H  | -0.889755 | 3.437818  | -3.282782 |
| H  | -1.831772 | 1.985626  | -2.852554 |
| H  | 0.889751  | 3.437900  | 3.282719  |
| H  | 1.831765  | 1.985692  | 2.852535  |
| H  | -0.124875 | 1.378274  | 4.222686  |
| H  | -1.207307 | 2.087695  | 2.995028  |
| H  | 3.444897  | 2.300272  | 1.440687  |
| H  | 3.659127  | 2.986082  | -0.179178 |
| H  | 1.353419  | 3.708408  | -0.305957 |
| H  | 2.057178  | 4.320208  | 1.208846  |
| H  | -2.087182 | -0.159931 | 2.814000  |
| H  | -0.811510 | -0.983732 | 3.747655  |
| H  | 0.027044  | -1.966467 | 1.563454  |
| H  | -1.609083 | -2.518109 | 2.008542  |
| H  | -3.444896 | 2.300248  | -1.440719 |
| H  | -3.659124 | 2.986090  | 0.179133  |
| H  | -1.353412 | 3.708412  | 0.305895  |
| H  | -2.057173 | 4.320186  | -1.208917 |

|   |           |           |           |
|---|-----------|-----------|-----------|
| H | 2.087160  | -0.160010 | -2.814007 |
| H | 0.811476  | -0.983836 | -3.747623 |
| H | -0.027047 | -1.966518 | -1.563388 |
| H | 1.609079  | -2.518162 | -2.008477 |
| H | 0.124862  | 1.378173  | -4.222701 |
| H | 1.207298  | 2.087612  | -2.995058 |
| H | -3.175806 | -3.130132 | 0.454881  |
| H | -5.167870 | 1.351193  | -0.255074 |
| H | 5.167871  | 1.351198  | 0.255055  |
| H | 3.175816  | -3.130140 | -0.454838 |
| H | -7.399957 | 0.351391  | -0.401662 |
| H | -8.843426 | -1.637697 | -0.352193 |
| H | -7.864770 | -3.887670 | 0.003490  |
| H | -5.437591 | -4.147193 | 0.318603  |
| H | 5.437602  | -4.147194 | -0.318561 |
| H | 7.864780  | -3.887663 | -0.003458 |
| H | 8.843433  | -1.637684 | 0.352198  |
| H | 7.399960  | 0.351402  | 0.401650  |

(g) K<sup>+</sup>(DN24C8) (closed)

|   |           |           |           |
|---|-----------|-----------|-----------|
| K | 0.000000  | 0.000000  | 2.432295  |
| O | 2.612824  | 0.328017  | 3.348978  |
| O | -2.612824 | -0.328017 | 3.348978  |
| O | -1.484644 | 2.240959  | 3.071901  |
| O | 1.801577  | 1.482288  | 0.889268  |
| O | -0.792353 | 1.793579  | 0.395956  |
| O | 1.484644  | -2.240959 | 3.071901  |
| O | 0.792353  | -1.793579 | 0.395956  |
| O | -1.801577 | -1.482288 | 0.889268  |
| C | 3.413100  | -0.833760 | 3.518468  |
| C | -3.413100 | 0.833760  | 3.518468  |
| C | -2.512558 | 1.946579  | 4.008574  |
| C | 1.457055  | 1.512437  | -0.434416 |
| C | 0.065810  | 1.698781  | -0.682740 |
| C | -3.180390 | -1.326833 | 1.208105  |
| C | -3.294367 | -1.401947 | 2.714774  |
| C | -1.893424 | 3.116483  | 2.030632  |
| C | -0.833714 | 3.112657  | 0.963810  |
| C | 3.180390  | 1.326833  | 1.208105  |
| C | 3.294367  | 1.401947  | 2.714774  |
| C | 1.893424  | -3.116483 | 2.030632  |
| C | 0.833714  | -3.112657 | 0.963810  |
| C | -0.065810 | -1.698781 | -0.682740 |
| C | -1.457055 | -1.512437 | -0.434416 |
| C | 2.512558  | -1.946579 | 4.008574  |
| C | -0.410551 | 1.756231  | -1.955155 |
| C | 2.325529  | 1.379803  | -1.481191 |
| C | 0.467235  | 1.637362  | -3.062608 |
| C | -2.325529 | -1.379803 | -1.481191 |
| C | -1.848729 | -1.440275 | -2.819116 |
| C | 0.410551  | -1.756231 | -1.955155 |
| C | 1.848729  | 1.440275  | -2.819116 |
| C | 2.725983  | 1.314574  | -3.922301 |
| C | 2.248362  | 1.396739  | -5.204119 |
| C | 0.872846  | 1.601109  | -5.443501 |
| C | 0.000000  | 1.712531  | -4.394780 |
| C | -0.467235 | -1.637362 | -3.062608 |
| C | 0.000000  | -1.712531 | -4.394780 |
| C | -0.872846 | -1.601109 | -5.443501 |

|   |           |           |           |
|---|-----------|-----------|-----------|
| C | -2.248362 | -1.396739 | -5.204119 |
| C | -2.725983 | -1.314574 | -3.922301 |
| H | 4.195895  | -0.643605 | 4.259203  |
| H | 3.891805  | -1.106232 | 2.573652  |
| H | -4.195895 | 0.643605  | 4.259203  |
| H | -3.891805 | 1.106232  | 2.573652  |
| H | -3.103500 | 2.841328  | 4.223323  |
| H | -2.015738 | 1.630853  | 4.924379  |
| H | -3.535646 | -0.366645 | 0.825309  |
| H | -3.761744 | -2.132632 | 0.753182  |
| H | -2.828495 | -2.321269 | 3.065782  |
| H | -4.347823 | -1.411484 | 3.006702  |
| H | -2.018104 | 4.129830  | 2.423436  |
| H | -2.839977 | 2.784921  | 1.596214  |
| H | -1.086620 | 3.832997  | 0.183547  |
| H | 0.141632  | 3.358049  | 1.386908  |
| H | 3.535646  | 0.366645  | 0.825309  |
| H | 3.761744  | 2.132632  | 0.753182  |
| H | 2.828495  | 2.321269  | 3.065782  |
| H | 4.347823  | 1.411484  | 3.006702  |
| H | 2.018104  | -4.129830 | 2.423436  |
| H | 2.839977  | -2.784921 | 1.596214  |
| H | 1.086620  | -3.832997 | 0.183547  |
| H | -0.141632 | -3.358049 | 1.386908  |
| H | 3.103500  | -2.841328 | 4.223323  |
| H | 2.015738  | -1.630853 | 4.924379  |
| H | -1.473505 | 1.884883  | -2.113772 |
| H | 3.383711  | 1.233429  | -1.320091 |
| H | -3.383711 | -1.233429 | -1.320091 |
| H | 1.473505  | -1.884883 | -2.113772 |
| H | 3.782481  | 1.165356  | -3.739473 |
| H | 2.928877  | 1.309641  | -6.039913 |
| H | 0.509773  | 1.660874  | -6.460009 |
| H | -1.059276 | 1.848481  | -4.570618 |
| H | 1.059276  | -1.848481 | -4.570618 |
| H | -0.509773 | -1.660874 | -6.460009 |
| H | -2.928877 | -1.309641 | -6.039913 |
| H | -3.782481 | -1.165356 | -3.739473 |

(h)  $K^+(\text{DN24C8})$  (closed')

|   |           |           |           |
|---|-----------|-----------|-----------|
| K | -2.211911 | -0.148879 | 0.173718  |
| O | -3.493845 | 2.316470  | 0.564882  |
| O | -3.223350 | -2.759895 | -0.115616 |
| O | -2.951317 | -1.087255 | -2.355599 |
| O | -1.521260 | 2.060286  | -1.429535 |
| O | -0.338301 | -0.253128 | -1.886245 |
| O | -2.319001 | 1.059983  | 2.732465  |
| O | 0.082715  | 0.013094  | 1.842773  |
| O | -0.636154 | -2.381282 | 0.951071  |
| C | -4.080123 | 2.388907  | 1.855962  |
| C | -3.524390 | -3.257614 | -1.412971 |
| C | -3.953356 | -2.088418 | -2.272948 |
| C | -0.156943 | 2.085904  | -1.324112 |
| C | 0.465811  | 0.835937  | -1.621561 |
| C | -1.069176 | -3.669177 | 0.527144  |
| C | -2.569444 | -3.709554 | 0.715075  |
| C | -1.895089 | -1.394377 | -3.253839 |
| C | -0.901812 | -0.265775 | -3.207254 |
| C | -2.272593 | 3.254475  | -1.216444 |

|   |           |           |           |
|---|-----------|-----------|-----------|
| C | -2.634863 | 3.400865  | 0.243371  |
| C | -1.204186 | 0.942222  | 3.603505  |
| C | -0.382359 | -0.242199 | 3.176495  |
| C | 1.078649  | -0.848536 | 1.431747  |
| C | 0.707706  | -2.126169 | 0.924184  |
| C | -3.062267 | 2.243502  | 2.967564  |
| C | 1.817512  | 0.701126  | -1.568117 |
| C | 0.607858  | 3.158367  | -0.960382 |
| C | 2.637348  | 1.800554  | -1.207953 |
| C | 1.667251  | -2.981289 | 0.458445  |
| C | 3.036962  | -2.602041 | 0.485904  |
| C | 2.383652  | -0.467622 | 1.471662  |
| C | 2.023183  | 3.038179  | -0.895489 |
| C | 2.840408  | 4.131049  | -0.520195 |
| C | 4.201970  | 3.994241  | -0.459427 |
| C | 4.812226  | 2.760317  | -0.772662 |
| C | 4.045569  | 1.686173  | -1.139273 |
| C | 3.403106  | -1.335003 | 1.003309  |
| C | 4.769216  | -0.966730 | 1.035488  |
| C | 5.730596  | -1.823032 | 0.569299  |
| C | 5.366661  | -3.084642 | 0.049562  |
| C | 4.052162  | -3.466187 | 0.009471  |
| H | -4.795887 | 1.570146  | 1.900167  |
| H | -4.621490 | 3.332328  | 1.976328  |
| H | -4.339511 | -3.985200 | -1.354297 |
| H | -2.650978 | -3.757739 | -1.839787 |
| H | -4.226239 | -2.443124 | -3.271365 |
| H | -4.823198 | -1.610992 | -1.824890 |
| H | -0.793900 | -3.820827 | -0.519668 |
| H | -0.594684 | -4.442040 | 1.136906  |
| H | -2.811514 | -3.449656 | 1.744353  |
| H | -2.943209 | -4.716893 | 0.513886  |
| H | -2.286019 | -1.499061 | -4.270527 |
| H | -1.396681 | -2.324224 | -2.966159 |
| H | -0.105990 | -0.429920 | -3.936124 |
| H | -1.398954 | 0.683241  | -3.403562 |
| H | -1.730855 | 4.123581  | -1.587166 |
| H | -3.181894 | 3.128117  | -1.799206 |
| H | -3.152868 | 4.352518  | 0.402369  |
| H | -1.732319 | 3.374554  | 0.860495  |
| H | -1.540025 | 0.804594  | 4.635921  |
| H | -0.595488 | 1.849330  | 3.543133  |
| H | 0.473749  | -0.356057 | 3.843970  |
| H | -0.975848 | -1.158225 | 3.187938  |
| H | -2.384109 | 3.101834  | 2.999574  |
| H | -3.583195 | 2.189448  | 3.928835  |
| H | 2.258322  | -0.265989 | -1.775590 |
| H | 0.165488  | 4.111618  | -0.709547 |
| H | 1.413266  | -3.955246 | 0.066215  |
| H | 2.632476  | 0.518925  | 1.841772  |
| H | 2.374602  | 5.079666  | -0.286192 |
| H | 4.816813  | 4.836993  | -0.175373 |
| H | 5.888643  | 2.669473  | -0.727620 |
| H | 4.503890  | 0.735697  | -1.379668 |
| H | 5.038106  | 0.003083  | 1.433592  |
| H | 6.773171  | -1.538990 | 0.601180  |
| H | 6.134396  | -3.753343 | -0.314026 |
| H | 3.774869  | -4.435830 | -0.383451 |

(i) K<sup>+</sup>(DN24C8) (open)

|   |           |           |           |
|---|-----------|-----------|-----------|
| K | 0.000000  | 0.000000  | 0.232599  |
| O | 1.383995  | 0.680146  | 2.502282  |
| O | -1.383995 | -0.680146 | 2.502282  |
| O | -2.714414 | 0.635657  | 0.465702  |
| O | 0.076227  | 2.725553  | 1.062338  |
| O | -0.981484 | 2.070800  | -1.301373 |
| O | 2.714414  | -0.635657 | 0.465702  |
| O | 0.981484  | -2.070800 | -1.301373 |
| O | -0.076227 | -2.725553 | 1.062338  |
| C | 2.791562  | 0.790777  | 2.350087  |
| C | -2.791562 | -0.790777 | 2.350087  |
| C | -3.282934 | 0.504239  | 1.757111  |
| C | 0.000000  | 3.733277  | 0.137062  |
| C | -0.576845 | 3.377279  | -1.116436 |
| C | -0.737531 | -3.034121 | 2.285593  |
| C | -0.756871 | -1.782820 | 3.136934  |
| C | -3.124622 | 1.821410  | -0.196158 |
| C | -2.391100 | 1.889997  | -1.512081 |
| C | 0.737531  | 3.034121  | 2.285593  |
| C | 0.756871  | 1.782820  | 3.136934  |
| C | 3.124622  | -1.821410 | -0.196158 |
| C | 2.391100  | -1.889997 | -1.512081 |
| C | 0.576845  | -3.377279 | -1.116436 |
| C | 0.000000  | -3.733277 | 0.137062  |
| C | 3.282934  | -0.504239 | 1.757111  |
| C | -0.676788 | 4.298201  | -2.116404 |
| C | 0.435977  | 5.014744  | 0.342004  |
| C | -0.239600 | 5.632205  | -1.928946 |
| C | -0.435977 | -5.014744 | 0.342004  |
| C | -0.321932 | -5.992377 | -0.680774 |
| C | 0.676788  | -4.298201 | -2.116404 |
| C | 0.321932  | 5.992377  | -0.680774 |
| C | 0.762616  | 7.323219  | -0.485178 |
| C | 0.650258  | 8.246596  | -1.489395 |
| C | 0.094334  | 7.884618  | -2.736159 |
| C | -0.340697 | 6.605179  | -2.951760 |
| C | 0.239600  | -5.632205 | -1.928946 |
| C | 0.340697  | -6.605179 | -2.951760 |
| C | -0.094334 | -7.884618 | -2.736159 |
| C | -0.650258 | -8.246596 | -1.489395 |
| C | -0.762616 | -7.323219 | -0.485178 |
| H | 3.264405  | 0.959857  | 3.322614  |
| H | 3.047587  | 1.613134  | 1.677532  |
| H | -3.264405 | -0.959857 | 3.322614  |
| H | -3.047587 | -1.613134 | 1.677532  |
| H | -4.375320 | 0.489106  | 1.691322  |
| H | -2.975159 | 1.345963  | 2.385940  |
| H | -1.745085 | -3.397116 | 2.072081  |
| H | -0.193365 | -3.815339 | 2.822592  |
| H | 0.261378  | -1.456177 | 3.336845  |
| H | -1.254782 | -2.010259 | 4.085191  |
| H | -2.884696 | 2.697435  | 0.416199  |
| H | -4.204504 | 1.798626  | -0.375507 |
| H | -2.499027 | 0.949504  | -2.048468 |
| H | -2.784511 | 2.700968  | -2.123557 |
| H | 1.745085  | 3.397116  | 2.072081  |
| H | 0.193365  | 3.815339  | 2.822592  |
| H | -0.261378 | 1.456177  | 3.336845  |

|   |           |           |           |
|---|-----------|-----------|-----------|
| H | 1.254782  | 2.010259  | 4.085191  |
| H | 2.884696  | -2.697435 | 0.416199  |
| H | 4.204504  | -1.798626 | -0.375507 |
| H | 2.499027  | -0.949504 | -2.048468 |
| H | 2.784511  | -2.700968 | -2.123557 |
| H | 4.375320  | -0.489106 | 1.691322  |
| H | 2.975159  | -1.345963 | 2.385940  |
| H | -1.085437 | 3.999102  | -3.073441 |
| H | 0.870642  | 5.316734  | 1.283081  |
| H | -0.870642 | -5.316734 | 1.283081  |
| H | 1.085437  | -3.999102 | -3.073441 |
| H | 1.190394  | 7.600369  | 0.469561  |
| H | 0.989279  | 9.260821  | -1.331280 |
| H | 0.013795  | 8.624450  | -3.519997 |
| H | -0.767604 | 6.321888  | -3.904991 |
| H | 0.767604  | -6.321888 | -3.904991 |
| H | -0.013795 | -8.624450 | -3.519997 |
| H | -0.989279 | -9.260821 | -1.331280 |
| H | -1.190394 | -7.600369 | 0.469561  |

(j) Rb<sup>+</sup>(DN24C8) (closed)

|    |           |           |           |
|----|-----------|-----------|-----------|
| Rb | -2.388770 | -0.199259 | 0.403026  |
| O  | -3.040126 | -3.071152 | 0.183512  |
| O  | -3.668398 | 2.502657  | 0.252953  |
| O  | -1.806820 | 2.174740  | 2.237395  |
| O  | -0.460154 | -2.329029 | 1.217196  |
| O  | 0.031668  | 0.021159  | 2.182932  |
| O  | -3.025661 | -1.494911 | -2.167677 |
| O  | -0.418598 | -0.524472 | -1.781705 |
| O  | -1.287878 | 1.951705  | -1.301432 |
| C  | -3.287709 | -3.662934 | -1.084390 |
| C  | -3.651801 | 3.373884  | 1.378351  |
| C  | -3.105349 | 2.633534  | 2.574010  |
| C  | 0.852769  | -1.952386 | 1.181693  |
| C  | 1.127777  | -0.661043 | 1.733864  |
| C  | -1.803507 | 3.264935  | -1.104769 |
| C  | -3.305748 | 3.140281  | -0.966742 |
| C  | -1.042040 | 1.771157  | 3.361689  |
| C  | 0.278595  | 1.246371  | 2.865825  |
| C  | -0.760414 | -3.655874 | 0.801393  |
| C  | -2.237967 | -3.882242 | 1.032865  |
| C  | -1.984471 | -1.714395 | -3.107987 |
| C  | -1.048840 | -0.536856 | -3.070873 |
| C  | 0.517997  | 0.477906  | -1.635353 |
| C  | 0.070308  | 1.806900  | -1.369537 |
| C  | -3.886332 | -2.610551 | -1.993301 |
| C  | 2.409535  | -0.196725 | 1.783036  |
| C  | 1.869693  | -2.710336 | 0.677977  |
| C  | 3.486126  | -0.980031 | 1.285360  |
| C  | 0.982211  | 2.811543  | -1.196638 |
| C  | 2.375269  | 2.536200  | -1.266219 |
| C  | 1.846770  | 0.193502  | -1.696364 |
| C  | 3.212112  | -2.241637 | 0.711553  |
| C  | 4.280948  | -3.010506 | 0.195268  |
| C  | 5.569101  | -2.545499 | 0.262503  |
| C  | 5.843202  | -1.292227 | 0.848755  |
| C  | 4.822549  | -0.524269 | 1.344955  |
| C  | 2.815216  | 1.212955  | -1.514027 |
| C  | 4.201348  | 0.940767  | -1.574685 |

|   |           |           |           |
|---|-----------|-----------|-----------|
| C | 5.113536  | 1.947472  | -1.403849 |
| C | 4.677611  | 3.267969  | -1.161281 |
| C | 3.340113  | 3.556818  | -1.091971 |
| H | -3.993641 | -4.492517 | -0.977736 |
| H | -2.359929 | -4.058908 | -1.505348 |
| H | -4.663727 | 3.729984  | 1.584829  |
| H | -3.010921 | 4.235437  | 1.181243  |
| H | -3.064799 | 3.314588  | 3.429892  |
| H | -3.749918 | 1.788476  | 2.840914  |
| H | -1.370374 | 3.692807  | -0.198436 |
| H | -1.549282 | 3.892688  | -1.962612 |
| H | -3.698136 | 2.522875  | -1.772805 |
| H | -3.767691 | 4.128528  | -1.031410 |
| H | -1.567380 | 0.992363  | 3.924028  |
| H | -0.866789 | 2.625404  | 4.022700  |
| H | 0.730762  | 1.968279  | 2.181543  |
| H | 0.948086  | 1.067720  | 3.710096  |
| H | -0.502413 | -3.776598 | -0.254054 |
| H | -0.181573 | -4.368707 | 1.394157  |
| H | -2.486759 | -3.613506 | 2.057987  |
| H | -2.476383 | -4.938823 | 0.884164  |
| H | -2.405293 | -1.817168 | -4.112959 |
| H | -1.424718 | -2.620787 | -2.863441 |
| H | -0.285099 | -0.644040 | -3.843809 |
| H | -1.596366 | 0.394141  | -3.221323 |
| H | -4.136288 | -3.057528 | -2.960222 |
| H | -4.801112 | -2.225349 | -1.545689 |
| H | 2.637093  | 0.776271  | 2.192315  |
| H | 1.682507  | -3.686077 | 0.254824  |
| H | 0.670187  | 3.829106  | -1.012220 |
| H | 2.157646  | -0.828397 | -1.871905 |
| H | 4.069483  | -3.977102 | -0.243983 |
| H | 6.381055  | -3.143568 | -0.127265 |
| H | 6.863291  | -0.937948 | 0.902327  |
| H | 5.026275  | 0.445174  | 1.780914  |
| H | 4.527105  | -0.077297 | -1.746316 |
| H | 6.172165  | 1.733200  | -1.451690 |
| H | 5.406971  | 4.055802  | -1.032864 |
| H | 3.006550  | 4.570372  | -0.909840 |

(k) Rb<sup>+</sup>(DN24C8) (closed')

|    |           |           |           |
|----|-----------|-----------|-----------|
| Rb | -2.357422 | -0.104561 | 0.196111  |
| O  | -3.212134 | 2.704042  | 0.595184  |
| O  | -3.078307 | -2.956355 | -0.144413 |
| O  | -2.905858 | -1.309966 | -2.450787 |
| O  | -1.364499 | 2.148565  | -1.524300 |
| O  | -0.349415 | -0.270350 | -1.961162 |
| O  | -2.137166 | 1.380416  | 2.814135  |
| O  | 0.108832  | 0.042257  | 1.897372  |
| O  | -0.545274 | -2.424016 | 1.098430  |
| C  | -3.706093 | 2.923721  | 1.908094  |
| C  | -3.225105 | -3.508560 | -1.446015 |
| C  | -3.769990 | -2.431910 | -2.360056 |
| C  | 0.000364  | 2.068992  | -1.456966 |
| C  | 0.525746  | 0.769853  | -1.732959 |
| C  | -0.918922 | -3.729992 | 0.672742  |
| C  | -2.425286 | -3.829057 | 0.766891  |
| C  | -1.826214 | -1.487712 | -3.356538 |
| C  | -0.928897 | -0.282538 | -3.273826 |



|   |           |           |           |
|---|-----------|-----------|-----------|
| C | -2.001822 | 3.407053  | -1.309491 |
| C | -2.249028 | 3.653864  | 0.162232  |
| C | -1.028534 | 1.136443  | 3.666526  |
| C | -0.355339 | -0.141078 | 3.241935  |
| C | 1.122152  | -0.813822 | 1.523209  |
| C | 0.789238  | -2.123601 | 1.071491  |
| C | -2.665253 | 2.684383  | 2.981592  |
| C | 1.866090  | 0.540965  | -1.698437 |
| C | 0.851302  | 3.092986  | -1.145681 |
| C | 2.772069  | 1.587477  | -1.392173 |
| C | 1.779329  | -2.968728 | 0.650203  |
| C | 3.137376  | -2.550006 | 0.665255  |
| C | 2.416094  | -0.393349 | 1.543227  |
| C | 2.255653  | 2.875553  | -1.109982 |
| C | 3.157242  | 3.919832  | -0.794117 |
| C | 4.507058  | 3.688545  | -0.763003 |
| C | 5.019908  | 2.404049  | -1.046278 |
| C | 4.169846  | 1.375221  | -1.353884 |
| C | 3.464186  | -1.250388 | 1.122624  |
| C | 4.819083  | -0.842934 | 1.147276  |
| C | 5.807580  | -1.693550 | 0.730101  |
| C | 5.482682  | -2.987680 | 0.267330  |
| C | 4.179436  | -3.407103 | 0.236175  |
| H | -4.532489 | 2.226546  | 2.034143  |
| H | -4.095028 | 3.942544  | 2.001731  |
| H | -3.928229 | -4.346994 | -1.417198 |
| H | -2.264869 | -3.880515 | -1.812625 |
| H | -3.957820 | -2.852733 | -3.352426 |
| H | -4.712488 | -2.063092 | -1.958427 |
| H | -0.575713 | -3.890403 | -0.351976 |
| H | -0.458451 | -4.478647 | 1.322496  |
| H | -2.745338 | -3.539164 | 1.766509  |
| H | -2.735351 | -4.862998 | 0.591616  |
| H | -2.208916 | -1.589005 | -4.376784 |
| H | -1.249615 | -2.381195 | -3.102476 |
| H | -0.133448 | -0.358419 | -4.017963 |
| H | -1.499661 | 0.632103  | -3.432983 |
| H | -1.420684 | 4.212277  | -1.757607 |
| H | -2.957669 | 3.335382  | -1.823041 |
| H | -2.635875 | 4.669168  | 0.300976  |
| H | -1.318671 | 3.544051  | 0.725659  |
| H | -1.358410 | 1.053409  | 4.706814  |
| H | -0.314994 | 1.961526  | 3.583436  |
| H | 0.494282  | -0.339450 | 3.897810  |
| H | -1.043882 | -0.987476 | 3.281512  |
| H | -1.855873 | 3.418226  | 2.917468  |
| H | -3.136717 | 2.788661  | 3.964449  |
| H | 2.231774  | -0.460797 | -1.886365 |
| H | 0.486134  | 4.083413  | -0.916106 |
| H | 1.559857  | -3.968383 | 0.305561  |
| H | 2.633548  | 0.616588  | 1.867220  |
| H | 2.765768  | 4.906824  | -0.583641 |
| H | 5.187384  | 4.494707  | -0.525831 |
| H | 6.087998  | 2.237472  | -1.023663 |
| H | 4.554083  | 0.386275  | -1.567263 |
| H | 5.057706  | 0.152942  | 1.496968  |
| H | 6.841688  | -1.379383 | 0.756023  |
| H | 6.271360  | -3.651367 | -0.058829 |
| H | 3.932078  | -4.401675 | -0.111958 |

(l) Rb<sup>+</sup>(DN24C8) (open)

|    |           |           |           |
|----|-----------|-----------|-----------|
| Rb | -0.042483 | -1.338848 | 0.016142  |
| O  | -1.832049 | -2.965871 | 1.814046  |
| O  | 1.580028  | -3.244073 | -1.523258 |
| O  | -0.901835 | -2.366257 | -2.656179 |
| O  | -3.056881 | -0.856964 | 0.350791  |
| O  | -1.891947 | 0.174802  | -1.796812 |
| O  | 0.549434  | -1.910230 | 2.975303  |
| O  | 2.533154  | -0.571306 | 1.470758  |
| O  | 2.654306  | -0.665008 | -1.189644 |
| C  | -1.592730 | -2.929436 | 3.213175  |
| C  | 0.780964  | -4.030650 | -2.396882 |
| C  | 0.002190  | -3.184606 | -3.380379 |
| C  | -3.385221 | 0.442377  | 0.078570  |
| C  | -2.741908 | 0.985343  | -1.071960 |
| C  | 3.472261  | -1.844709 | -1.186328 |
| C  | 2.822920  | -2.856745 | -2.090065 |
| C  | -1.592527 | -1.465525 | -3.508104 |
| C  | -2.596689 | -0.686111 | -2.705255 |
| C  | -3.737210 | -1.501519 | 1.421188  |
| C  | -3.211197 | -2.918479 | 1.476973  |
| C  | 1.923181  | -1.910947 | 3.326196  |
| C  | 2.544865  | -0.610921 | 2.894142  |
| C  | 3.174595  | 0.479836  | 0.872080  |
| C  | 3.236420  | 0.409466  | -0.550092 |
| C  | -0.114615 | -3.068375 | 3.458665  |
| C  | -2.947993 | 2.280687  | -1.433508 |
| C  | -4.238816 | 1.215731  | 0.814425  |
| C  | -3.816413 | 3.113135  | -0.681778 |
| C  | 3.827135  | 1.404038  | -1.266922 |
| C  | 4.399460  | 2.526626  | -0.616479 |
| C  | 3.720475  | 1.548443  | 1.527310  |
| C  | -4.475370 | 2.568294  | 0.447628  |
| C  | -5.353117 | 3.391822  | 1.191671  |
| C  | -5.561046 | 4.695106  | 0.826799  |
| C  | -4.902193 | 5.237584  | -0.297560 |
| C  | -4.048196 | 4.463051  | -1.035621 |
| C  | 4.347710  | 2.593700  | 0.797237  |
| C  | 4.920944  | 3.709831  | 1.451651  |
| C  | 5.516827  | 4.708866  | 0.729490  |
| C  | 5.567752  | 4.640903  | -0.679685 |
| C  | 5.020175  | 3.573119  | -1.338274 |
| H  | -2.114356 | -3.760084 | 3.698665  |
| H  | -1.943967 | -1.988283 | 3.645103  |
| H  | 0.084675  | -4.582378 | -1.767195 |
| H  | 1.403811  | -4.748903 | -2.938166 |
| H  | 0.670152  | -2.555393 | -3.977150 |
| H  | -0.548439 | -3.840887 | -4.063036 |
| H  | 4.465137  | -1.594836 | -1.565677 |
| H  | 3.555419  | -2.229589 | -0.168851 |
| H  | 3.475196  | -3.730123 | -2.188160 |
| H  | 2.676192  | -2.410963 | -3.076773 |
| H  | -2.122232 | -2.021132 | -4.289044 |
| H  | -0.881095 | -0.781710 | -3.981335 |
| H  | -3.204382 | -0.073655 | -3.374458 |
| H  | -3.241156 | -1.361099 | -2.140148 |
| H  | -3.547601 | -0.968653 | 2.355847  |
| H  | -4.813128 | -1.508567 | 1.228745  |

|   |           |           |           |
|---|-----------|-----------|-----------|
| H | -3.307397 | -3.374116 | 0.492898  |
| H | -3.797064 | -3.501907 | 2.192808  |
| H | 2.435585  | -2.750724 | 2.845849  |
| H | 2.031070  | -2.007713 | 4.411327  |
| H | 1.975147  | 0.230187  | 3.295031  |
| H | 3.574273  | -0.560860 | 3.256087  |
| H | 0.057199  | -3.172612 | 4.534775  |
| H | 0.266951  | -3.960363 | 2.952093  |
| H | -2.437965 | 2.668496  | -2.305874 |
| H | -4.745826 | 0.823966  | 1.684212  |
| H | 3.849942  | 1.327418  | -2.346292 |
| H | 3.682484  | 1.628666  | 2.603776  |
| H | -5.858922 | 2.976391  | 2.053615  |
| H | -6.234278 | 5.315836  | 1.401371  |
| H | -5.076432 | 6.267985  | -0.573550 |
| H | -3.541115 | 4.872231  | -1.899636 |
| H | 4.882353  | 3.762191  | 2.531951  |
| H | 5.953059  | 5.556966  | 1.238507  |
| H | 6.042441  | 5.436672  | -1.236214 |
| H | 5.056677  | 3.514537  | -2.418251 |

(m) Cs<sup>+</sup>(DN24C8) (closed)

|    |           |           |           |
|----|-----------|-----------|-----------|
| Cs | -2.398695 | -0.191150 | 0.403925  |
| O  | -2.844141 | -3.186587 | 0.153996  |
| O  | -3.509692 | 2.676675  | 0.178173  |
| O  | -1.667249 | 2.301823  | 2.185239  |
| O  | -0.306283 | -2.315044 | 1.266121  |
| O  | 0.139428  | 0.077245  | 2.196358  |
| O  | -2.894499 | -1.648707 | -2.233574 |
| O  | -0.348687 | -0.531503 | -1.824935 |
| O  | -1.155984 | 1.986636  | -1.391626 |
| C  | -2.996052 | -3.811358 | -1.112696 |
| C  | -3.443702 | 3.572055  | 1.281976  |
| C  | -2.944842 | 2.829627  | 2.497151  |
| C  | 0.998030  | -1.907636 | 1.235870  |
| C  | 1.246147  | -0.600215 | 1.764396  |
| C  | -1.620609 | 3.320937  | -1.209440 |
| C  | -3.125509 | 3.265208  | -1.059007 |
| C  | -0.943302 | 1.866397  | 3.324268  |
| C  | 0.378279  | 1.314479  | 2.861178  |
| C  | -0.560580 | -3.656980 | 0.866425  |
| C  | -2.035821 | -3.931613 | 1.055248  |
| C  | -1.840400 | -1.789553 | -3.174224 |
| C  | -0.973562 | -0.560763 | -3.115847 |
| C  | 0.609365  | 0.451535  | -1.690663 |
| C  | 0.197290  | 1.797388  | -1.452826 |
| C  | -3.662284 | -2.829033 | -2.052579 |
| C  | 2.520903  | -0.115043 | 1.813540  |
| C  | 2.034631  | -2.656147 | 0.756739  |
| C  | 3.615606  | -0.887695 | 1.340362  |
| C  | 1.138142  | 2.778851  | -1.298918 |
| C  | 2.523026  | 2.464910  | -1.359750 |
| C  | 1.930717  | 0.130422  | -1.740409 |
| C  | 3.368349  | -2.164764 | 0.790626  |
| C  | 4.454304  | -2.926400 | 0.300054  |
| C  | 5.733894  | -2.438582 | 0.369635  |
| C  | 5.981298  | -1.168733 | 0.931650  |
| C  | 4.943389  | -0.407864 | 1.402144  |
| C  | 2.927419  | 1.125387  | -1.577324 |

|   |           |           |           |
|---|-----------|-----------|-----------|
| C | 4.305783  | 0.814953  | -1.630240 |
| C | 5.244258  | 1.800900  | -1.483306 |
| C | 4.843866  | 3.137667  | -1.271013 |
| C | 3.514550  | 3.463279  | -1.207640 |
| H | -3.624942 | -4.702209 | -1.016235 |
| H | -2.023447 | -4.122149 | -1.502763 |
| H | -4.433289 | 3.992055  | 1.477045  |
| H | -2.752785 | 4.389755  | 1.067814  |
| H | -2.879870 | 3.524689  | 3.340334  |
| H | -3.634129 | 2.023590  | 2.773760  |
| H | -1.164521 | 3.743750  | -0.312068 |
| H | -1.347153 | 3.926910  | -2.077068 |
| H | -3.551332 | 2.647303  | -1.847571 |
| H | -3.542383 | 4.271729  | -1.146777 |
| H | -1.503289 | 1.097971  | 3.867592  |
| H | -0.762838 | 2.709904  | 3.997768  |
| H | 0.847036  | 2.021650  | 2.172968  |
| H | 1.032080  | 1.146664  | 3.719944  |
| H | -0.267737 | -3.789522 | -0.178060 |
| H | 0.021173  | -4.342078 | 1.488485  |
| H | -2.331014 | -3.641017 | 2.062041  |
| H | -2.224703 | -5.002166 | 0.935782  |
| H | -2.252553 | -1.900031 | -4.182049 |
| H | -1.228850 | -2.665601 | -2.943377 |
| H | -0.203345 | -0.615403 | -3.887989 |
| H | -1.570234 | 0.341389  | -3.256725 |
| H | -3.855119 | -3.312869 | -3.014854 |
| H | -4.615134 | -2.515602 | -1.628824 |
| H | 2.730349  | 0.867983  | 2.207496  |
| H | 1.870692  | -3.644388 | 0.354185  |
| H | 0.855995  | 3.808806  | -1.137737 |
| H | 2.213145  | -0.902941 | -1.895610 |
| H | 4.263030  | -3.905479 | -0.120487 |
| H | 6.559436  | -3.030905 | 0.000109  |
| H | 6.994709  | -0.795934 | 0.986394  |
| H | 5.126889  | 0.574195  | 1.818497  |
| H | 4.605015  | -0.215414 | -1.775427 |
| H | 6.296724  | 1.556934  | -1.524141 |
| H | 5.593968  | 3.908596  | -1.160584 |
| H | 3.207995  | 4.489107  | -1.048019 |

(n) Cs<sup>+</sup>(DN24C8) (closed')

|    |           |           |           |
|----|-----------|-----------|-----------|
| Cs | -2.412717 | -0.055790 | 0.216696  |
| O  | -2.959788 | 2.947704  | 0.509498  |
| O  | -2.940649 | -3.055379 | -0.089062 |
| O  | -2.830522 | -1.488130 | -2.463809 |
| O  | -1.190874 | 2.128379  | -1.627046 |
| O  | -0.304486 | -0.364367 | -1.976525 |
| O  | -1.955763 | 1.658625  | 2.796065  |
| O  | 0.169799  | 0.124717  | 1.902702  |
| O  | -0.429835 | -2.386449 | 1.184486  |
| C  | -3.392829 | 3.286564  | 1.818352  |
| C  | -3.030533 | -3.659885 | -1.371974 |
| C  | -3.628430 | -2.654049 | -2.332630 |
| C  | 0.168093  | 1.974983  | -1.570018 |
| C  | 0.621938  | 0.639109  | -1.792611 |
| C  | -0.763122 | -3.713319 | 0.791107  |
| C  | -2.266516 | -3.860446 | 0.867194  |
| C  | -1.743267 | -1.636632 | -3.365182 |

|   |           |           |           |
|---|-----------|-----------|-----------|
| C | -0.882012 | -0.404836 | -3.289105 |
| C | -1.747020 | 3.432518  | -1.464406 |
| C | -1.931720 | 3.781929  | -0.003717 |
| C | -0.859617 | 1.359919  | 3.646528  |
| C | -0.287094 | 0.022329  | 3.257613  |
| C | 1.201250  | -0.727182 | 1.573730  |
| C | 0.897482  | -2.057166 | 1.161055  |
| C | -2.349991 | 3.016308  | 2.882686  |
| C | 1.949552  | 0.343152  | -1.761662 |
| C | 1.076726  | 2.965786  | -1.317915 |
| C | 2.913497  | 1.353361  | -1.517747 |
| C | 1.910127  | -2.895340 | 0.779412  |
| C | 3.260571  | -2.453111 | 0.803392  |
| C | 2.487936  | -0.284940 | 1.602015  |
| C | 2.468411  | 2.678299  | -1.291172 |
| C | 3.427296  | 3.688747  | -1.040868 |
| C | 4.764130  | 3.389907  | -1.021363 |
| C | 5.205649  | 2.068465  | -1.249099 |
| C | 4.298867  | 1.071005  | -1.490519 |
| C | 3.558287  | -1.136648 | 1.230314  |
| C | 4.905687  | -0.707161 | 1.271373  |
| C | 5.915553  | -1.552723 | 0.897698  |
| C | 5.619800  | -2.862902 | 0.461330  |
| C | 4.323928  | -3.303899 | 0.415787  |
| H | -4.275330 | 2.677431  | 2.005876  |
| H | -3.685326 | 4.340659  | 1.859686  |
| H | -3.679249 | -4.540507 | -1.323587 |
| H | -2.042919 | -3.981414 | -1.712363 |
| H | -3.782617 | -3.125238 | -3.308123 |
| H | -4.595054 | -2.326463 | -1.952962 |
| H | -0.400664 | -3.892829 | -0.223645 |
| H | -0.290638 | -4.430021 | 1.467902  |
| H | -2.611902 | -3.541061 | 1.849314  |
| H | -2.534900 | -4.912407 | 0.733787  |
| H | -2.119728 | -1.757006 | -4.385773 |
| H | -1.139555 | -2.509726 | -3.103804 |
| H | -0.084154 | -0.465117 | -4.032273 |
| H | -1.476143 | 0.493427  | -3.458173 |
| H | -1.134960 | 4.174181  | -1.976811 |
| H | -2.721828 | 3.390841  | -1.944612 |
| H | -2.226369 | 4.833567  | 0.082403  |
| H | -0.998516 | 3.625104  | 0.543210  |
| H | -1.182546 | 1.337138  | 4.692121  |
| H | -0.086129 | 2.124568  | 3.529150  |
| H | 0.553505  | -0.215990 | 3.911584  |
| H | -1.034220 | -0.770460 | 3.335445  |
| H | -1.475361 | 3.660845  | 2.750797  |
| H | -2.782286 | 3.233206  | 3.865334  |
| H | 2.260382  | -0.683618 | -1.908822 |
| H | 0.767878  | 3.984133  | -1.132550 |
| H | 1.715177  | -3.909189 | 0.463059  |
| H | 2.683017  | 0.738669  | 1.896060  |
| H | 3.090309  | 4.703582  | -0.872678 |
| H | 5.488791  | 4.170621  | -0.835751 |
| H | 6.263869  | 1.847067  | -1.233284 |
| H | 4.628479  | 0.053479  | -1.656276 |
| H | 5.121693  | 0.302095  | 1.596367  |
| H | 6.943935  | -1.221369 | 0.935724  |
| H | 6.424870  | -3.522262 | 0.167951  |

|   |          |           |          |
|---|----------|-----------|----------|
| H | 4.099088 | -4.311134 | 0.089389 |
|---|----------|-----------|----------|

(o) Cs<sup>+</sup>(DN24C8) (open)

|    |           |           |           |
|----|-----------|-----------|-----------|
| Cs | -0.012612 | -1.108745 | 0.010611  |
| O  | -1.704293 | -2.802715 | 2.003888  |
| O  | 1.582718  | -3.045365 | -1.721309 |
| O  | -1.029655 | -2.282518 | -2.684603 |
| O  | -3.142975 | -0.830361 | 0.502061  |
| O  | -2.196298 | 0.175826  | -1.773776 |
| O  | 0.794417  | -1.786745 | 3.005142  |
| O  | 2.787302  | -0.534990 | 1.388217  |
| O  | 2.743769  | -0.498825 | -1.284767 |
| C  | -1.392137 | -2.675070 | 3.383216  |
| C  | 0.763489  | -3.844970 | -2.563306 |
| C  | -0.111320 | -3.016293 | -3.478082 |
| C  | -3.581013 | 0.426843  | 0.189438  |
| C  | -3.057975 | 0.953845  | -1.028042 |
| C  | 3.519343  | -1.700264 | -1.407861 |
| C  | 2.791798  | -2.631547 | -2.338703 |
| C  | -1.877607 | -1.468432 | -3.478852 |
| C  | -2.882907 | -0.778454 | -2.598462 |
| C  | -3.710195 | -1.460981 | 1.644656  |
| C  | -3.097717 | -2.840934 | 1.733877  |
| C  | 2.188540  | -1.892558 | 3.243138  |
| C  | 2.870391  | -0.624307 | 2.807057  |
| C  | 3.433793  | 0.517319  | 0.797408  |
| C  | 3.405489  | 0.517493  | -0.628101 |
| C  | 0.087391  | -2.880234 | 3.571134  |
| C  | -3.385802 | 2.210494  | -1.434752 |
| C  | -4.438721 | 1.176667  | 0.945452  |
| C  | -4.262523 | 3.017333  | -0.665454 |
| C  | 3.991980  | 1.524289  | -1.331809 |
| C  | 4.649769  | 2.589806  | -0.666964 |
| C  | 4.064984  | 1.530304  | 1.465522  |
| C  | -4.800569 | 2.487436  | 0.532735  |
| C  | -5.685503 | 3.284159  | 1.297260  |
| C  | -6.015504 | 4.547701  | 0.885736  |
| C  | -5.477213 | 5.075445  | -0.307772 |
| C  | -4.618965 | 4.326259  | -1.066711 |
| C  | 4.688807  | 2.586387  | 0.748504  |
| C  | 5.347626  | 3.644708  | 1.418254  |
| C  | 5.938331  | 4.655734  | 0.708659  |
| C  | 5.898335  | 4.658216  | -0.702563 |
| C  | 5.267038  | 3.647237  | -1.375697 |
| H  | -1.928058 | -3.439231 | 3.954831  |
| H  | -1.674248 | -1.687970 | 3.760226  |
| H  | 0.130157  | -4.440265 | -1.907396 |
| H  | 1.381677  | -4.523319 | -3.158802 |
| H  | 0.487739  | -2.327639 | -4.082906 |
| H  | -0.652928 | -3.684529 | -4.156635 |
| H  | 4.497607  | -1.453734 | -1.825578 |
| H  | 3.645121  | -2.156870 | -0.424897 |
| H  | 3.422112  | -3.503248 | -2.541700 |
| H  | 2.589840  | -2.113057 | -3.279638 |
| H  | -2.414382 | -2.087091 | -4.205860 |
| H  | -1.283635 | -0.724714 | -4.019255 |
| H  | -3.610070 | -0.251341 | -3.219557 |
| H  | -3.398501 | -1.502383 | -1.965550 |
| H  | -3.495614 | -0.872269 | 2.539820  |

|   |           |           |           |
|---|-----------|-----------|-----------|
| H | -4.793695 | -1.541631 | 1.525092  |
| H | -3.214746 | -3.345063 | 0.776047  |
| H | -3.616139 | -3.422434 | 2.501641  |
| H | 2.601161  | -2.749243 | 2.700816  |
| H | 2.373108  | -2.033384 | 4.313157  |
| H | 2.380374  | 0.238226  | 3.263929  |
| H | 3.918901  | -0.652163 | 3.112615  |
| H | 0.303032  | -2.943402 | 4.642687  |
| H | 0.394108  | -3.815757 | 3.093149  |
| H | -2.965698 | 2.587170  | -2.358460 |
| H | -4.855681 | 0.797112  | 1.866837  |
| H | 3.944629  | 1.501155  | -2.412909 |
| H | 4.100128  | 1.557319  | 2.544581  |
| H | -6.098982 | 2.880004  | 2.212140  |
| H | -6.693216 | 5.148231  | 1.476273  |
| H | -5.747386 | 6.074322  | -0.620013 |
| H | -4.203979 | 4.724107  | -1.983523 |
| H | 5.378771  | 3.643195  | 2.500077  |
| H | 6.440272  | 5.459266  | 1.229266  |
| H | 6.369881  | 5.462745  | -1.249067 |
| H | 5.233504  | 3.642613  | -2.457355 |
